# Supplementary material for: Temperature dependence of high field 13C dynamic nuclear polarization processes with trityl radicals below 35 Kelvin
Source: Royal Society of Chemistry journal article supplement (doi:10.1039/c3cp51628h), 2013-01-01
Supplement: c3cp51628h.pdf [file c3cp51628h.pdf]

## Supplemental Materials

The *Supplemental Materials* section contains plots of the trityl echo-detected EPR spectra (Fig. S1). It also shows the plots that can be found in the main text (**Fig. 2**, **Fig. 4** and **Fig. 5**) with the addition of a fourth sample, p-Gd-Pure (Fig. S2, Fig. S3, and Fig. S4, respectively). The sample p-Gd-Pure is simply p-Pure with the addition of 2mM Gd595. Lastly, Fig. S5 shows the DNP enhancement and the DNP build-up time as a function of forward

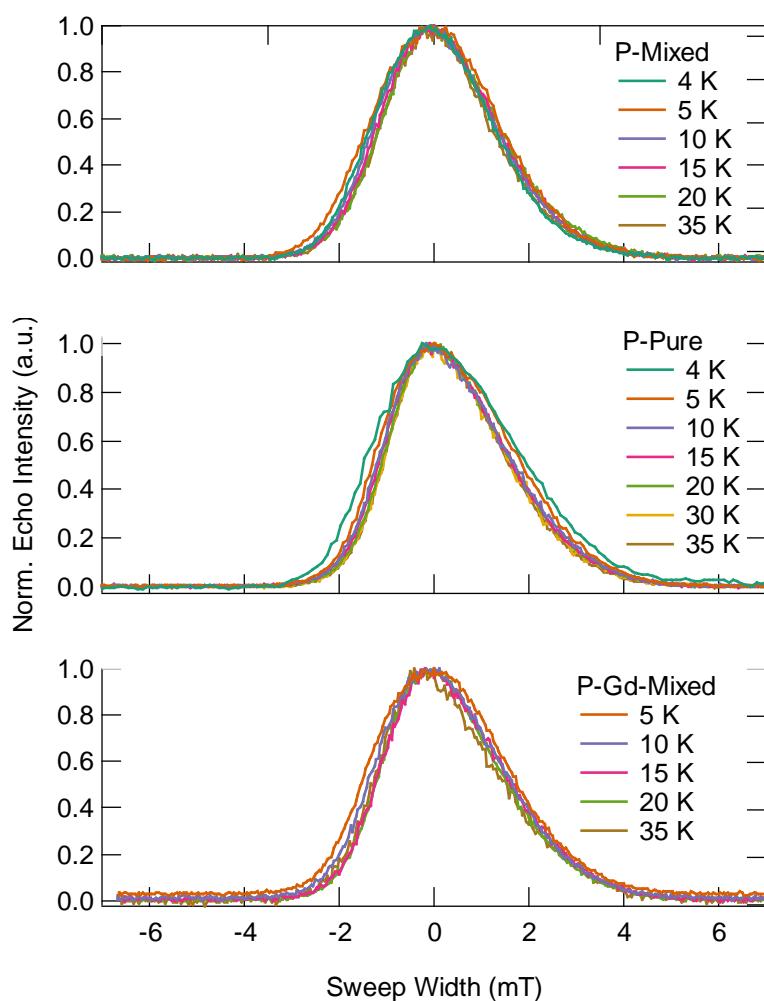

**Figure S1.** Echo-detected trityl EPR at 240 GHz of P-Mixed plotted at varying lattice temperatures. The spectra at FWHM broadens at low temperatures while no significant changes in lineshape are seen.

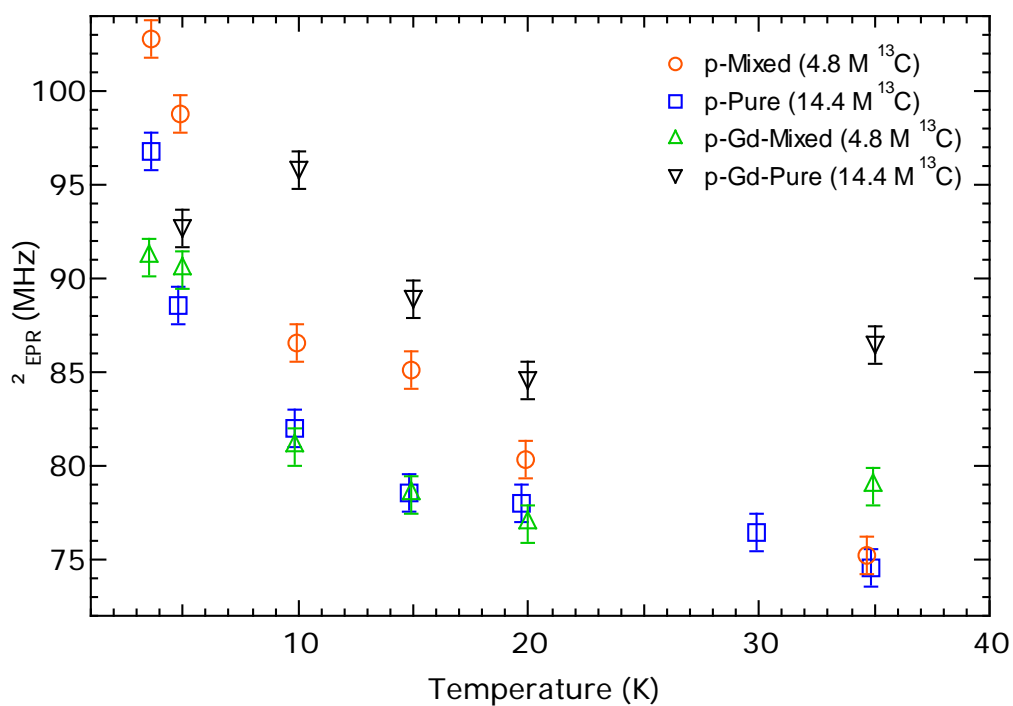

**Figure S2.** Inhomogeneously broadened echo-detected trityl EPR FWHM ( $\Delta_{\text{EPR}}$ ) plotted as a function of lattice temperature for four samples at 8.5 T. The p-Mixed, p-Pure, p-Gd-Mixed, and p-Gd-Pure all have the same trityl concentration of 15 mM. Interestingly, the trityl  $\Delta_{\text{EPR}}$  increases at lower temperature.

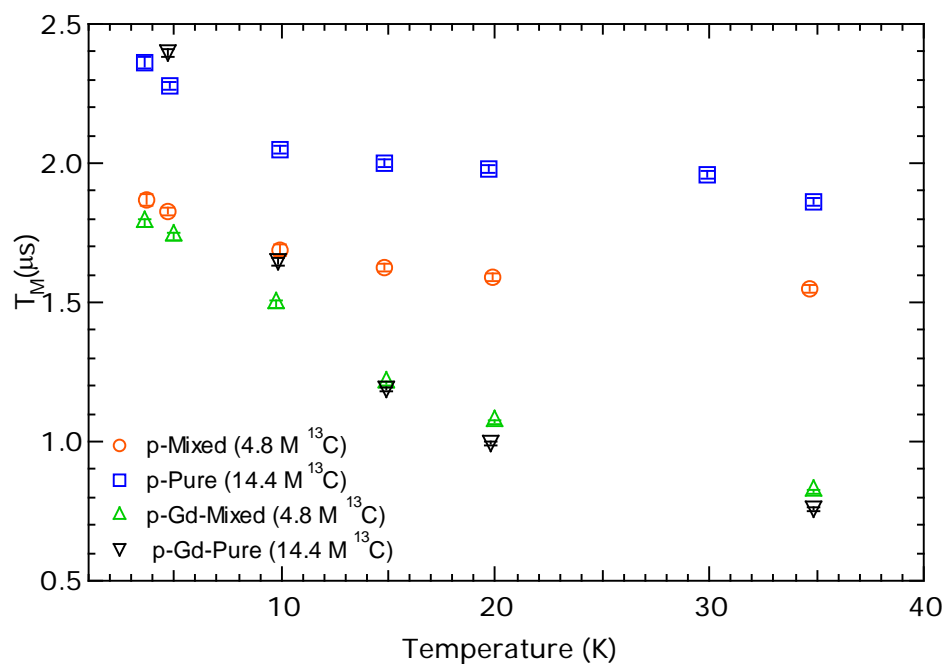

**Figure S3.** Electron spin phase memory time ( $T_M$ ) constants as a function of lattice temperature for four different samples. The p-Mixed, p-Pure, p-Gd-Mixed, and p-Gd-Pure samples all have the same trityl concentration of 15 mM. Interestingly, the same trend of the  $T_M$  values matching up with their non-Gd doped counterpart at low temperatures is seen. This again suggests a solvent induced  $T_M$  relaxation at low lattice temperatures.

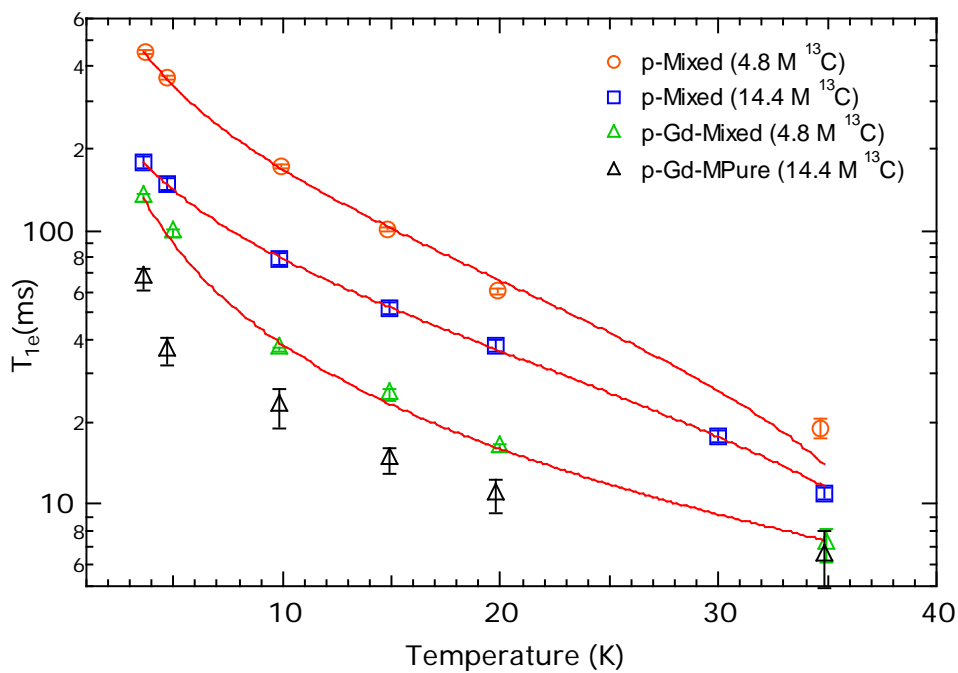

**Figure S4.** The electron spin-lattice relaxation time ( $T_{1e}$ ) constants as a function of lattice temperature for four different samples. The p-Mixed, p-Pure, p-Gd-Mixed, and p-Gd-Pure samples all have the same trityl concentration of 15 mM. The p-Gd-Pure sample have the lowest  $T_{1e}$  of all the samples. Power law fits are shown in red.

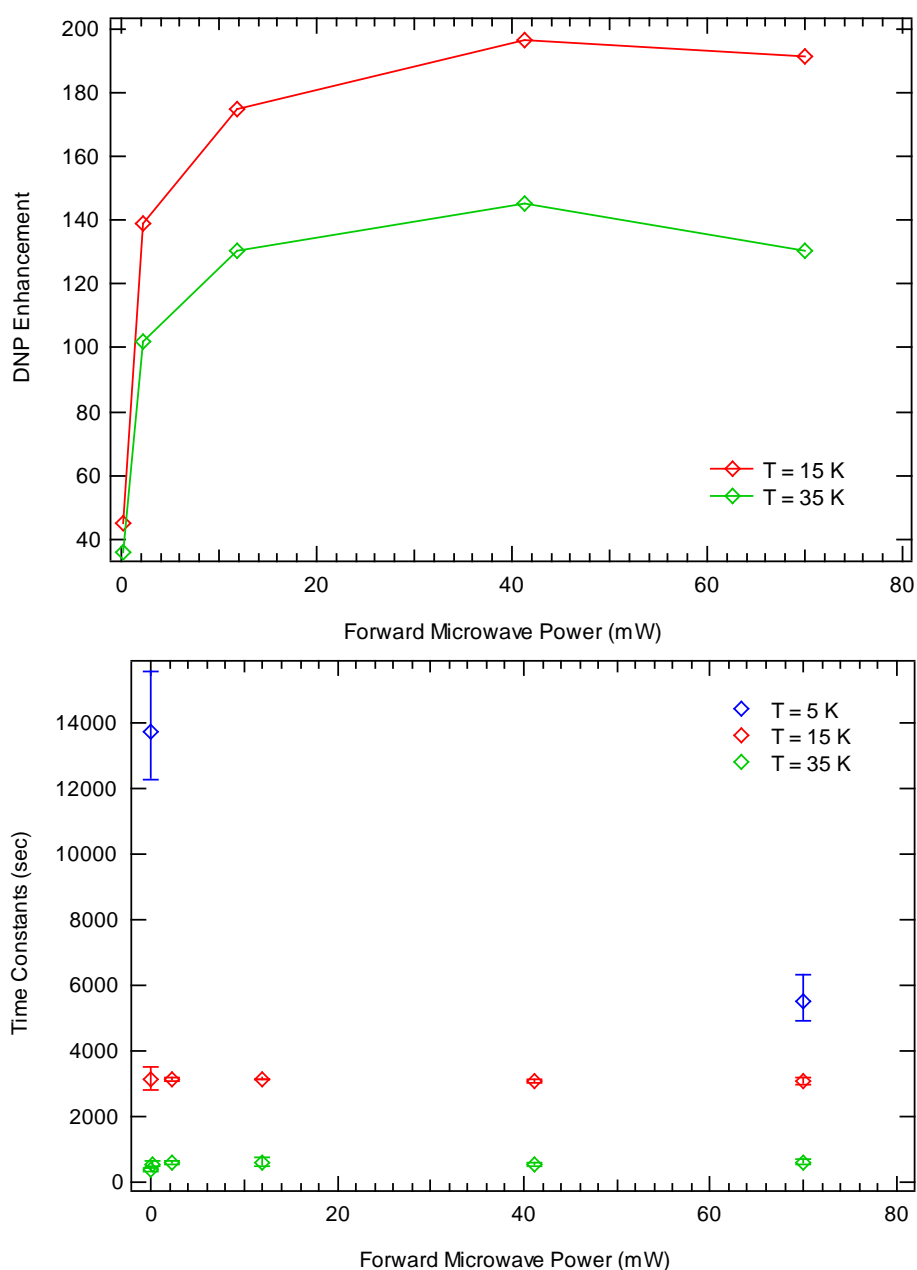

**Figure S5.** *Top:* DNP enhancement of p-Mixed as a function of  $\mu$ W forward power at two different lattice temperatures. This shows that OX063Me trityl radical EPR is easily saturated even down to 10 mW of forward power (which is actually much less when talking about the actual power at the sample). The percentage change between each data point is roughly equal for both lattice temperatures. Lines are drawn to guide the eye.

*Bottom:* DNP build-up time ( $T_{\text{DNP}}$ ) of p-Mixed as a function of  $\mu$ W forward power at various lattice temperatures. When the  $\mu$ W power goes to zero the associated time constant is  $T_{\text{In}}$ . At temperatures above 15 K it is clear that  $T_{\text{DNP}}$  stays roughly constant with  $\mu$ W forward power. It is implied that when the forward MW power is 0, the time constant is  $T_{\text{In}}$  rather than  $T_{\text{DNP}}$ .
